# Supplementary material
Source: PubMed Central journal article supplement (PMC4613488)
Supplement: ejhg201520x1.pdf [file ejhg201520x1.pdf]

**Table S1: Primers' sequences**

| <b>primer</b>                     | <b>sequence 5'-3'</b>   |
|-----------------------------------|-------------------------|
| SOS1promoter_fragment_A_sense     | GAAACGAAGGGCCCAGGG      |
| SOS1promoter_fragment_A_antisense | AACTGAACCTGCTCGCTACT    |
| SOS1promoter_fragment_B_sense     | AGCTTTCCTCCTCCTTACC     |
| SOS1promoter_fragment_B_antisense | GAGGACGTGTGGAGGGAC      |
| SOS1promoter_fragment_C_sense     | AGATTCCCCAACCAACGACCT   |
| SOS1promoter_fragment_C_antisense | GACACAGGTACCAGCCGT      |
| SOS1promoter_fragment_D_sense     | ACGGCTGGTACCTGTGTC      |
| SOS1promoter_fragment_D_antisense | CGAGACCGGGAAGAAAGACG    |
| SOS1_rs1059310_sense              | AGCCATTCCTCCTAGGCAAC    |
| SOS1_rs1059310_antisense          | CATTTTGTTTGGGTGTGTGG    |
| SOS1_rs115465194_sense            | TGAAAGTGGCATGCATCTGG    |
| SOS1_rs115465194_antisense        | GGTTTGGCTGAAAGAATTATGCA |
