# Supplementary material
Source: PubMed Central journal article supplement (PMC4613488)
Supplement: ejhg201520x2.pdf [file ejhg201520x2.pdf]

**Table S2: Polimorphisms detected in SOS1 regulatory regions**

| <b>Polimorphism/Allele</b> | <b>Frequency*</b> |
|----------------------------|-------------------|
| promoter region            |                   |
| <b>rs368211853</b>         |                   |
| A                          | nd                |
| G                          | nd                |
| <b>rs56263073</b>          |                   |
| -                          | 0,1469            |
| C                          | 0,9853            |
| <b>rs189109845</b>         |                   |
| T                          | 0,0013            |
| G                          | 0,9986            |
| <b>rs375493196</b>         |                   |
| C                          | nd                |
| G                          | nd                |
| <b>rs368569135</b>         |                   |
| C                          | nd                |
| A                          | nd                |
| <b>rs139592595</b>         |                   |
| G                          | 0,9985            |
| A                          | 0,0014            |
| <b>rs201218035</b>         |                   |
| G                          | 0,9963            |
| C                          | 0,0036            |
| <b>rs56360279</b>          |                   |
| G                          | nd                |
| A                          | nd                |
| <b>rs372010415</b>         |                   |
| G                          | nd                |
| A                          | nd                |
| <b>rs181491122</b>         |                   |
| A                          | 0,8576            |
| G                          | 0,1423            |
| <b>rs149710810</b>         |                   |
| GGGGCGGAGCT                | 0,9063            |
| -                          | 0,0936            |
| <b>rs377094543</b>         |                   |
| CTGGGGCGGAG                | nd                |
| -                          | nd                |
| <b>rs376643748</b>         |                   |
| G                          | nd                |
| T                          | nd                |
| <b>rs113095722</b>         |                   |
| C                          | nd                |
| G                          | nd                |
| <b>rs184259916</b>         |                   |
| G                          | 0,9958            |
| A                          | 0,0041            |

|                      |        |
|----------------------|--------|
| <b>rs57378308</b>    |        |
| G                    | 0,8263 |
| A                    | 0,1736 |
| <b>rs146749262</b>   |        |
| G                    | 0,9981 |
| A                    | 0,0018 |
| <hr/>                |        |
| miR-124 binding site |        |
| <hr/>                |        |
| <b>rs115465194</b>   |        |
| A                    | 0,9952 |
| G                    | 0,0047 |

\*the allele frequencies are from 1000genomes database
